# Supplementary material for: Surface adhered fluorescent carbon dots extracted from the harmful diesel soot for sensing Fe(iii) and Hg(ii) ions
Source: Royal Society of Chemistry journal article supplement (doi:10.1039/d1nj04189d), 2021-01-01
Supplement: d1nj04189d1.pdf [file d1nj04189d1.pdf]

## Surface Adhered Fluorescent Carbon Dots Extracted from the Harmful Diesel Soot for Sensing Fe (III) and Hg (II) ions

Gunture Kumar,<sup>†</sup> Jaidev Kaushik,<sup>†</sup> Deepika Saini,<sup>†</sup> Ravindra Singh,<sup>‡</sup> Prashant Dubey,<sup>¶\*</sup> and  
Sumit Kumar Sonkar<sup>†\*</sup>

<sup>†</sup>*Department of Chemistry, Malaviya National Institute of Technology Jaipur, 302017, India.*

<sup>‡</sup>*Department of Chemistry, Maharani Shri Jaya Government Post-Graduate College, Bharatpur, Rajasthan-321001, India.*

<sup>¶</sup>*Centre of Material Sciences, Institute of Interdisciplinary Studies, Nehru Science Complex, University of Allahabad, Prayagraj-211002, Uttar Pradesh, India*

\* To whom correspondence should be addressed: [sksonkar.chy@mnit.ac.in](mailto:sksonkar.chy@mnit.ac.in),  
[pdubey.au@gmail.com](mailto:pdubey.au@gmail.com)

A comparative table for the selective sensing of Fe(III) and Hg(II) metal ions using various type of CDs is summarized in Table S1.

| S. No. | FL Sensor               | Emission           | LOD                         | Quencher | Ref.      |
|--------|-------------------------|--------------------|-----------------------------|----------|-----------|
| 1.     | FJU-13a-Eu & FJU-13a-Tb | Red & Green        | 1.41 $\mu$ M & 1.01 $\mu$ M | Fe(III)  | 1         |
| 2.     | N-GQDs                  | Blue               | 90 nM                       | Fe(III)  | 2         |
| 3.     | B-CDs                   | Blue               | 242 nM                      | Fe(III)  | 3         |
| 4.     | N-CDs                   | Blue               | 10 nM                       | Fe(III)  | 4         |
| 5.     | CDs                     | Blue-Green         | 352 nM                      | Fe(III)  | This Work |
| 6.     | LR-CDs                  | Blue, Green, & Red | 18.7 nM                     | Hg(II)   | 5         |

|     |             |            |           |        |           |
|-----|-------------|------------|-----------|--------|-----------|
| 7.  | N-CDs       | Blue       | 50 nM     | Hg(II) | 4         |
| 8.  | CQD-Tb      | Blue-Green | 168.8 ppb | Hg(II) | 6         |
| 9.  | Ag Clusters | Red        | 10 nM     | Hg(II) | 7         |
| 10. | CDs         | Blue-Green | 898 nM    | Hg(II) | This Work |

### References:

1. L. Liu, Y. Wang, R. Lin, Z. Yao, Q. Lin, L. Wang, Z. Zhang and S. Xiang, *Dalton transactions*, 2018, **47**, 16190-16196.
2. J. Ju and W. Chen, *Biosensors and bioelectronics*, 2014, **58**, 219-225.
3. F. Wang, Q. Hao, Y. Zhang, Y. Xu and W. Lei, *Microchimica Acta*, 2016, **183**, 273-279.
4. A. Pankaj, K. Tewari, S. Singh and S. P. Singh, *Journal of environmental chemical engineering*, 2018, **6**, 5561-5569.
5. D. Gu, S. Shang, Q. Yu and J. Shen, *Applied surface science*, 2016, **390**, 38-42.
6. T. K. Mondal, U. K. Ghorai and S. K. Saha, *ACS omega*, 2018, **3**, 11439-11446.
7. C. Guo and J. Irudayaraj, *Analytical chemistry*, 2011, **83**, 2883-2889.
